# Supplementary material
Source: publisher figshare collection journal article supplement (https://acs.figshare.com/ndownloader/files/5134585)
Supplement: Supplementary file 1 [file 5134585]

 
 
 
data_sep1804
 
_audit_creation_date            2004-09-15T10:05:25-00:00
_audit_creation_method         'WinGX routine CIF_UPDATE'
_audit_conform_dict_name        cif_core.dic
_audit_conform_dict_version     2.2
_audit_conform_dict_location    ftp://ftp.iucr.org/pub/cif_core.dic
_publ_requested_category        FM
 
#----------------------------------------------------------------------------#
#                   CHEMICAL INFORMATION                                     #
#----------------------------------------------------------------------------#
 
_chemical_name_systematic
;
 ?
;
_chemical_formula_moiety                'C76 H96 Ca2 N4'
_chemical_formula_sum                   'C76 H96 Ca2 N4'
_chemical_formula_weight                1145.73
_chemical_compound_source               'synthesis as described'
 
#----------------------------------------------------------------------------#
#                   UNIT CELL INFORMATION                                    #
#----------------------------------------------------------------------------#
 
_symmetry_cell_setting                  monoclinic
_symmetry_space_group_name_H-M          P2(1)/n
_symmetry_space_group_name_Hall         '-P 2yn'
_symmetry_Int_Tables_number             14
loop_
    _symmetry_equiv_pos_as_xyz
'x, y, z'
'-x+1/2, y+1/2, -z+1/2'
'-x, -y, -z'
'x-1/2, -y-1/2, z-1/2'
 
_cell_length_a                          14.9183(3)
_cell_length_b                          13.1452(2)
_cell_length_c                          18.3729(4)
_cell_angle_alpha                       90
_cell_angle_beta                        103.916(1)
_cell_angle_gamma                       90
_cell_volume                            3497.25(12)
_cell_formula_units_Z                   2
_cell_measurement_temperature           173(2)
_cell_measurement_reflns_used           26627
_cell_measurement_theta_min             3.705
_cell_measurement_theta_max             25.028
_cell_measurement_wavelength            0.71073
 
#----------------------------------------------------------------------------#
#                   CRYSTAL INFORMATION                                      #
#----------------------------------------------------------------------------#
 
_exptl_crystal_description              prism
_exptl_crystal_colour                   colourless
_exptl_crystal_size_max                 0.3
_exptl_crystal_size_mid                 0.2
_exptl_crystal_size_min                 0.2
_exptl_crystal_density_diffrn           1.088
_exptl_crystal_density_method           'not measured'
_exptl_crystal_F_000                    1240
_exptl_special_details
;
 ?
;
 
#----------------------------------------------------------------------------#
#                   ABSORPTION CORRECTION                                    #
#----------------------------------------------------------------------------#
 
_exptl_absorpt_coefficient_mu           0.205
_exptl_absorpt_correction_type          multi-scan
_exptl_absorpt_process_details
;
        [c.f. r.h. blessing, acta cryst. (1995), a51, 33-38]
;
_exptl_absorpt_correction_T_min         0.857
_exptl_absorpt_correction_T_max         0.962
 
#----------------------------------------------------------------------------#
#                   DATA COLLECTION                                          #
#----------------------------------------------------------------------------#
 
_diffrn_source                          'Enraf Nonius FR590'
_diffrn_ambient_temperature             173(2)
_diffrn_radiation_wavelength            0.71073
_diffrn_radiation_type                  MoK\a
_diffrn_radiation_monochromator         graphite
_diffrn_radiation_probe                 x-ray
_diffrn_detector                        'CCD plate'
_diffrn_orient_matrix_type              'by Nonius Collect from scalepack cell'
_diffrn_orient_matrix_ub_11             -0.441685E-1
_diffrn_orient_matrix_ub_12             -0.458962E-1
_diffrn_orient_matrix_ub_13             -0.34554E-1
_diffrn_orient_matrix_ub_21             -0.255848E-1
_diffrn_orient_matrix_ub_22             -0.229045E-1
_diffrn_orient_matrix_ub_23             0.428292E-1
_diffrn_orient_matrix_ub_31             -0.465151E-1
_diffrn_orient_matrix_ub_32             0.56179E-1
_diffrn_orient_matrix_ub_33             -0.107676E-1
_diffrn_measurement_device              '95mm CCD camera on \k-goniostat'
_diffrn_measurement_device_type         KappaCCD
_diffrn_measurement_method              'CCD rotation images, thick slices'
_diffrn_reflns_av_R_equivalents         0.0448
_diffrn_reflns_av_unetI/netI            0.0257
_diffrn_reflns_number                   43924
_diffrn_reflns_limit_h_min              -17
_diffrn_reflns_limit_h_max              17
_diffrn_reflns_limit_k_min              -15
_diffrn_reflns_limit_k_max              15
_diffrn_reflns_limit_l_min              -21
_diffrn_reflns_limit_l_max              21
_diffrn_reflns_theta_min                3.72
_diffrn_reflns_theta_max                25.06
_diffrn_reflns_theta_full               25.06
_diffrn_measured_fraction_theta_full
                                        0.993
_diffrn_measured_fraction_theta_max
                                        0.993
_reflns_number_total                    6160
_reflns_number_gt                       5147
_reflns_threshold_expression            >2sigma(I)
 
#----------------------------------------------------------------------------#
#                   COMPUTER PROGRAMS USED                                   #
#----------------------------------------------------------------------------#
 
_computing_data_collection              'Collect (Nonius BV, 1997-2000)'
_computing_cell_refinement
                                       'HKL Scalepack (Otwinowski & Minor 1997)'
_computing_data_reduction
                             'HKL Denzo and Scalepack (Otwinowski & Minor 1997)'
_computing_structure_solution           'SHELXS-97 (Sheldrick, 1997)'
_computing_structure_refinement         'SHELXL-97 (Sheldrick, 1997)'
_computing_molecular_graphics           'Ortep-3 for Windows (Farrugia, 1997)'
_computing_publication_material
                                   'WinGX publication routines (Farrugia, 1999)'
 
#----------------------------------------------------------------------------#
#                   REFINEMENT INFORMATION                                   #
#----------------------------------------------------------------------------#
 
_refine_special_details
;
 Refinement of F^2^ against ALL reflections.  The weighted R-factor wR and
 goodness of fit S are based on F^2^, conventional R-factors R are based
 on F, with F set to zero for negative F^2^. The threshold expression of
 F^2^ > 2sigma(F^2^) is used only for calculating R-factors(gt) etc. and is
 not relevant to the choice of reflections for refinement.  R-factors based
 on F^2^ are statistically about twice as large as those based on F, and R-
 factors based on ALL data will be even larger.
;
_refine_ls_structure_factor_coef        Fsqd
_refine_ls_matrix_type                  full
_refine_ls_weighting_scheme             calc
_refine_ls_weighting_details
         'calc w=1/[\s^2^(Fo^2^)+(0.0480P)^2^+1.4844P] where P=(Fo^2^+2Fc^2^)/3'
_atom_sites_solution_primary            direct
_atom_sites_solution_secondary          difmap
_atom_sites_solution_hydrogens          geom
_refine_ls_hydrogen_treatment           riding
_refine_ls_extinction_method            none
_refine_ls_number_reflns                6160
_refine_ls_number_parameters            373
_refine_ls_number_restraints            0
_refine_ls_R_factor_all                 0.0533
_refine_ls_R_factor_gt                  0.0414
_refine_ls_wR_factor_ref                0.1088
_refine_ls_wR_factor_gt                 0.1012
_refine_ls_goodness_of_fit_ref          1.06
_refine_ls_restrained_S_all             1.06
_refine_ls_shift/su_max                 0.001
_refine_ls_shift/su_mean                0
_refine_diff_density_max                0.214
_refine_diff_density_min                -0.224
_refine_diff_density_rms                0.036
 
#----------------------------------------------------------------------------#
#                   ATOMIC TYPES, COORDINATES AND THERMAL PARAMETERS         #
#----------------------------------------------------------------------------#
 
loop_
    _atom_type_symbol
    _atom_type_description
    _atom_type_scat_dispersion_real
    _atom_type_scat_dispersion_imag
    _atom_type_scat_source
C C 0.0033 0.0016 'International Tables Vol C Tables 4.2.6.8 and 6.1.1.4'
H H 0 0 'International Tables Vol C Tables 4.2.6.8 and 6.1.1.4'
Ca Ca 0.2262 0.3064 'International Tables Vol C Tables 4.2.6.8 and 6.1.1.4'
N N 0.0061 0.0033 'International Tables Vol C Tables 4.2.6.8 and 6.1.1.4'
 
loop_
    _atom_site_label
    _atom_site_type_symbol
    _atom_site_fract_x
    _atom_site_fract_y
    _atom_site_fract_z
    _atom_site_U_iso_or_equiv
    _atom_site_adp_type
    _atom_site_occupancy
    _atom_site_symmetry_multiplicity
    _atom_site_calc_flag
    _atom_site_refinement_flags
    _atom_site_disorder_assembly
    _atom_site_disorder_group
Ca Ca 0.61237(2) 0.51392(3) 0.482229(19) 0.03166(11) Uani 1 1 d . . .
N1 N 0.73296(9) 0.43593(10) 0.44427(7) 0.0292(3) Uani 1 1 d . . .
N2 N 0.70686(9) 0.65325(10) 0.48153(8) 0.0295(3) Uani 1 1 d . . .
C1 C 0.79746(12) 0.47800(13) 0.41560(10) 0.0328(4) Uani 1 1 d . . .
C2 C 0.81052(12) 0.58361(14) 0.41155(10) 0.0349(4) Uani 1 1 d . . .
H2 H 0.8499 0.6039 0.3806 0.042 Uiso 1 1 calc R . .
C3 C 0.77424(12) 0.66381(13) 0.44629(9) 0.0325(4) Uani 1 1 d . . .
C4 C 0.86535(15) 0.41227(16) 0.38697(13) 0.0503(5) Uani 1 1 d . . .
H4A H 0.9242 0.4096 0.4248 0.076 Uiso 1 1 calc R . .
H4B H 0.8754 0.4415 0.3405 0.076 Uiso 1 1 calc R . .
H4C H 0.8403 0.3434 0.3771 0.076 Uiso 1 1 calc R . .
C5 C 0.81814(14) 0.76716(15) 0.44261(12) 0.0475(5) Uani 1 1 d . . .
H5A H 0.7743 0.8116 0.4087 0.071 Uiso 1 1 calc R . .
H5B H 0.874 0.7593 0.4239 0.071 Uiso 1 1 calc R . .
H5C H 0.8345 0.7974 0.4928 0.071 Uiso 1 1 calc R . .
C6 C 0.73154(12) 0.32798(13) 0.45647(10) 0.0320(4) Uani 1 1 d . . .
C7 C 0.78126(12) 0.28791(14) 0.52557(10) 0.0373(4) Uani 1 1 d . . .
C8 C 0.77424(15) 0.18390(15) 0.53845(12) 0.0476(5) Uani 1 1 d . . .
H8 H 0.8075 0.1557 0.5847 0.057 Uiso 1 1 calc R . .
C9 C 0.72031(16) 0.12138(16) 0.48572(14) 0.0565(6) Uani 1 1 d . . .
H9 H 0.7173 0.0506 0.4952 0.068 Uiso 1 1 calc R . .
C10 C 0.67063(16) 0.16173(16) 0.41901(13) 0.0536(5) Uani 1 1 d . . .
H10 H 0.6333 0.118 0.3829 0.064 Uiso 1 1 calc R . .
C11 C 0.67376(13) 0.26534(14) 0.40318(11) 0.0408(4) Uani 1 1 d . . .
C12 C 0.84097(14) 0.35471(16) 0.58541(10) 0.0448(5) Uani 1 1 d . . .
H12 H 0.8339 0.4266 0.5671 0.054 Uiso 1 1 calc R . .
C13 C 0.80975(17) 0.3499(2) 0.65862(12) 0.0600(6) Uani 1 1 d . . .
H13A H 0.849 0.3943 0.6959 0.09 Uiso 1 1 calc R . .
H13B H 0.8147 0.2798 0.6773 0.09 Uiso 1 1 calc R . .
H13C H 0.7454 0.3725 0.6497 0.09 Uiso 1 1 calc R . .
C14 C 0.94319(16) 0.3264(2) 0.59958(14) 0.0720(7) Uani 1 1 d . . .
H14A H 0.9796 0.3715 0.6381 0.108 Uiso 1 1 calc R . .
H14B H 0.9636 0.334 0.553 0.108 Uiso 1 1 calc R . .
H14C H 0.9518 0.2557 0.6168 0.108 Uiso 1 1 calc R . .
C15 C 0.61508(14) 0.30679(16) 0.33041(11) 0.0490(5) Uani 1 1 d . . .
H15 H 0.6154 0.3826 0.3348 0.059 Uiso 1 1 calc R . .
C16 C 0.6535(2) 0.2802(3) 0.26308(14) 0.0855(9) Uani 1 1 d . . .
H16A H 0.7175 0.3037 0.272 0.128 Uiso 1 1 calc R . .
H16B H 0.6162 0.3135 0.2182 0.128 Uiso 1 1 calc R . .
H16C H 0.6514 0.2064 0.2557 0.128 Uiso 1 1 calc R . .
C17 C 0.51411(16) 0.27192(19) 0.31596(14) 0.0630(6) Uani 1 1 d . . .
H17A H 0.4789 0.3005 0.2684 0.095 Uiso 1 1 calc R . .
H17B H 0.4876 0.2955 0.3568 0.095 Uiso 1 1 calc R . .
H17C H 0.5114 0.1975 0.3134 0.095 Uiso 1 1 calc R . .
C18 C 0.68688(11) 0.73675(12) 0.52547(10) 0.0311(4) Uani 1 1 d . . .
C19 C 0.73099(13) 0.74029(14) 0.60226(10) 0.0370(4) Uani 1 1 d . . .
C20 C 0.71431(15) 0.82329(15) 0.64435(11) 0.0448(5) Uani 1 1 d . . .
H20 H 0.7453 0.8278 0.6959 0.054 Uiso 1 1 calc R . .
C21 C 0.65350(15) 0.89894(15) 0.61239(12) 0.0471(5) Uani 1 1 d . . .
H21 H 0.6449 0.9565 0.6412 0.057 Uiso 1 1 calc R . .
C22 C 0.60567(14) 0.89099(15) 0.53918(12) 0.0467(5) Uani 1 1 d . . .
H22 H 0.5614 0.9417 0.5186 0.056 Uiso 1 1 calc R . .
C23 C 0.62015(12) 0.81023(14) 0.49374(10) 0.0379(4) Uani 1 1 d . . .
C24 C 0.79386(16) 0.65454(16) 0.63968(11) 0.0492(5) Uani 1 1 d . . .
H24 H 0.7782 0.5934 0.6067 0.059 Uiso 1 1 calc R . .
C25 C 0.77727(18) 0.6261(2) 0.71549(12) 0.0650(6) Uani 1 1 d . . .
H25A H 0.7116 0.6115 0.71 0.098 Uiso 1 1 calc R . .
H25B H 0.7958 0.6828 0.7506 0.098 Uiso 1 1 calc R . .
H25C H 0.8137 0.5657 0.7348 0.098 Uiso 1 1 calc R . .
C26 C 0.89493(19) 0.6774(3) 0.64662(18) 0.0903(10) Uani 1 1 d . . .
H26A H 0.9324 0.6199 0.6708 0.136 Uiso 1 1 calc R . .
H26B H 0.9123 0.7388 0.677 0.136 Uiso 1 1 calc R . .
H26C H 0.9056 0.6883 0.5966 0.136 Uiso 1 1 calc R . .
C27 C 0.56247(15) 0.80260(15) 0.41397(12) 0.0500(5) Uani 1 1 d . . .
H27 H 0.5812 0.7393 0.3913 0.06 Uiso 1 1 calc R . .
C28 C 0.5772(2) 0.8931(2) 0.36529(14) 0.0763(8) Uani 1 1 d . . .
H28A H 0.5391 0.8841 0.3142 0.115 Uiso 1 1 calc R . .
H28B H 0.6424 0.8967 0.364 0.115 Uiso 1 1 calc R . .
H28C H 0.5595 0.9562 0.3866 0.115 Uiso 1 1 calc R . .
C29 C 0.45992(16) 0.7939(2) 0.41208(16) 0.0727(8) Uani 1 1 d . . .
H29A H 0.4243 0.7885 0.36 0.109 Uiso 1 1 calc R . .
H29B H 0.4402 0.8545 0.4352 0.109 Uiso 1 1 calc R . .
H29C H 0.4495 0.7333 0.4399 0.109 Uiso 1 1 calc R . .
C30 C 0.55239(12) 0.48393(15) 0.59583(10) 0.0390(4) Uani 1 1 d . . .
C31 C 0.53089(12) 0.46866(14) 0.65495(10) 0.0372(4) Uani 1 1 d . . .
C32 C 0.50854(12) 0.45138(14) 0.72649(10) 0.0368(4) Uani 1 1 d . . .
C33 C 0.42138(14) 0.41478(16) 0.72945(11) 0.0448(5) Uani 1 1 d . . .
H33 H 0.3762 0.4016 0.6843 0.054 Uiso 1 1 calc R . .
C34 C 0.40082(15) 0.39773(16) 0.79791(12) 0.0501(5) Uani 1 1 d . . .
H34 H 0.3413 0.373 0.799 0.06 Uiso 1 1 calc R . .
C35 C 0.46494(16) 0.41588(17) 0.86496(12) 0.0530(5) Uani 1 1 d . . .
C36 C 0.55078(16) 0.45342(18) 0.86152(12) 0.0568(6) Uani 1 1 d . . .
H36 H 0.5956 0.4672 0.9067 0.068 Uiso 1 1 calc R . .
C37 C 0.57235(14) 0.47109(16) 0.79351(11) 0.0473(5) Uani 1 1 d . . .
H37 H 0.6315 0.497 0.7927 0.057 Uiso 1 1 calc R . .
C38 C 0.4419(2) 0.3933(2) 0.93900(14) 0.0830(9) Uani 1 1 d . . .
H38A H 0.3984 0.4445 0.9487 0.125 Uiso 1 1 calc R . .
H38B H 0.4985 0.3952 0.9792 0.125 Uiso 1 1 calc R . .
H38C H 0.4138 0.3257 0.9371 0.125 Uiso 1 1 calc R . .
 
loop_
    _atom_site_aniso_label
    _atom_site_aniso_U_11
    _atom_site_aniso_U_22
    _atom_site_aniso_U_33
    _atom_site_aniso_U_23
    _atom_site_aniso_U_13
    _atom_site_aniso_U_12
Ca 0.02470(19) 0.0369(2) 0.0370(2) -0.00202(15) 0.01451(14) -0.00272(14)
N1 0.0253(7) 0.0330(8) 0.0305(7) -0.0007(6) 0.0091(6) -0.0003(6)
N2 0.0264(7) 0.0319(7) 0.0315(7) -0.0004(6) 0.0094(6) 0.0002(6)
C1 0.0279(9) 0.0395(10) 0.0337(9) -0.0015(7) 0.0125(7) -0.0010(7)
C2 0.0311(9) 0.0419(10) 0.0366(9) 0.0005(8) 0.0175(8) -0.0037(8)
C3 0.0307(9) 0.0359(9) 0.0317(9) 0.0025(7) 0.0091(7) -0.0033(7)
C4 0.0458(12) 0.0480(11) 0.0688(14) -0.0044(10) 0.0364(11) 0.0025(9)
C5 0.0475(12) 0.0408(11) 0.0610(13) -0.0003(9) 0.0263(10) -0.0082(9)
C6 0.0271(9) 0.0331(9) 0.0396(10) -0.0004(7) 0.0155(7) 0.0015(7)
C7 0.0329(10) 0.0417(10) 0.0409(10) 0.0047(8) 0.0156(8) 0.0052(8)
C8 0.0482(12) 0.0457(11) 0.0530(12) 0.0137(9) 0.0200(10) 0.0102(9)
C9 0.0579(14) 0.0357(11) 0.0815(16) 0.0058(11) 0.0274(13) 0.0002(10)
C10 0.0526(13) 0.0386(11) 0.0692(15) -0.0065(10) 0.0139(11) -0.0071(9)
C11 0.0372(10) 0.0386(10) 0.0486(11) -0.0045(8) 0.0142(9) -0.0022(8)
C12 0.0429(11) 0.0530(12) 0.0368(10) 0.0068(9) 0.0066(9) 0.0034(9)
C13 0.0563(14) 0.0804(16) 0.0444(12) -0.0018(11) 0.0142(10) 0.0085(12)
C14 0.0397(13) 0.115(2) 0.0603(15) -0.0071(14) 0.0110(11) -0.0046(13)
C15 0.0471(12) 0.0471(11) 0.0481(12) -0.0090(9) 0.0027(9) -0.0060(9)
C16 0.0665(18) 0.138(3) 0.0519(15) -0.0012(16) 0.0135(13) -0.0010(17)
C17 0.0481(13) 0.0627(15) 0.0711(16) -0.0140(12) 0.0006(11) -0.0055(11)
C18 0.0279(9) 0.0298(9) 0.0380(9) -0.0021(7) 0.0129(7) -0.0045(7)
C19 0.0404(10) 0.0371(10) 0.0353(10) -0.0010(7) 0.0126(8) -0.0010(8)
C20 0.0541(13) 0.0458(11) 0.0365(10) -0.0052(8) 0.0149(9) -0.0018(9)
C21 0.0531(12) 0.0400(11) 0.0514(12) -0.0111(9) 0.0187(10) 0.0028(9)
C22 0.0419(11) 0.0376(11) 0.0597(13) -0.0047(9) 0.0103(10) 0.0084(9)
C23 0.0330(10) 0.0339(9) 0.0453(11) -0.0012(8) 0.0063(8) 0.0002(8)
C24 0.0644(14) 0.0445(11) 0.0351(10) -0.0013(8) 0.0050(9) 0.0106(10)
C25 0.0696(16) 0.0727(16) 0.0472(13) 0.0175(11) 0.0034(11) 0.0009(13)
C26 0.0635(17) 0.116(2) 0.100(2) 0.0520(19) 0.0358(16) 0.0446(17)
C27 0.0488(12) 0.0400(11) 0.0520(12) -0.0050(9) -0.0061(10) 0.0084(9)
C28 0.0809(19) 0.0839(19) 0.0537(14) 0.0111(13) -0.0043(13) -0.0035(15)
C29 0.0466(14) 0.0595(15) 0.096(2) 0.0005(13) -0.0147(13) 0.0010(11)
C30 0.0298(9) 0.0484(11) 0.0406(10) -0.0020(8) 0.0118(8) -0.0036(8)
C31 0.0292(9) 0.0437(10) 0.0388(10) -0.0006(8) 0.0084(8) -0.0014(8)
C32 0.0341(10) 0.0414(10) 0.0371(10) 0.0010(8) 0.0130(8) -0.0009(8)
C33 0.0379(11) 0.0563(12) 0.0412(11) -0.0022(9) 0.0116(9) -0.0071(9)
C34 0.0427(12) 0.0594(13) 0.0549(13) -0.0023(10) 0.0246(10) -0.0095(10)
C35 0.0638(14) 0.0586(13) 0.0426(11) -0.0019(10) 0.0248(10) -0.0134(11)
C36 0.0595(14) 0.0734(15) 0.0360(11) 0.0007(10) 0.0088(10) -0.0214(12)
C37 0.0399(11) 0.0620(13) 0.0400(11) 0.0040(9) 0.0094(9) -0.0133(9)
C38 0.101(2) 0.105(2) 0.0536(14) -0.0050(14) 0.0397(15) -0.0366(18)
 
 
#----------------------------------------------------------------------------#
#                   MOLECULAR GEOMETRY                                       #
#----------------------------------------------------------------------------#
 
_geom_special_details
;
 All esds (except the esd in the dihedral angle between two l.s. planes)
 are estimated using the full covariance matrix.  The cell esds are taken
 into account individually in the estimation of esds in distances, angles
 and torsion angles; correlations between esds in cell parameters are only
 used when they are defined by crystal symmetry.  An approximate (isotropic)
 treatment of cell esds is used for estimating esds involving l.s. planes.
;
loop_
    _geom_bond_atom_site_label_1
    _geom_bond_atom_site_label_2
    _geom_bond_distance
    _geom_bond_site_symmetry_2
    _geom_bond_publ_flag
Ca N2 2.3131(14) . ?
Ca N1 2.3190(14) . ?
Ca C30 2.4920(18) . ?
Ca C30 2.5304(19) 3_666 ?
Ca C31 2.8951(18) 3_666 ?
N1 C1 1.324(2) . ?
N1 C6 1.438(2) . ?
N2 C3 1.327(2) . ?
N2 C18 1.436(2) . ?
C1 C2 1.406(3) . ?
C1 C4 1.518(2) . ?
C2 C3 1.406(2) . ?
C3 C5 1.517(2) . ?
C6 C11 1.405(3) . ?
C6 C7 1.409(3) . ?
C7 C8 1.396(3) . ?
C7 C12 1.517(3) . ?
C8 C9 1.373(3) . ?
C9 C10 1.377(3) . ?
C10 C11 1.396(3) . ?
C11 C15 1.512(3) . ?
C12 C13 1.527(3) . ?
C12 C14 1.530(3) . ?
C15 C16 1.524(3) . ?
C15 C17 1.535(3) . ?
C18 C19 1.407(2) . ?
C18 C23 1.409(2) . ?
C19 C20 1.394(3) . ?
C19 C24 1.521(3) . ?
C20 C21 1.379(3) . ?
C21 C22 1.367(3) . ?
C22 C23 1.399(3) . ?
C23 C27 1.514(3) . ?
C24 C26 1.512(4) . ?
C24 C25 1.519(3) . ?
C27 C29 1.526(3) . ?
C27 C28 1.535(3) . ?
C30 C31 1.221(2) . ?
C31 C32 1.449(2) . ?
C32 C37 1.388(3) . ?
C32 C33 1.400(3) . ?
C33 C34 1.383(3) . ?
C34 C35 1.387(3) . ?
C35 C36 1.388(3) . ?
C35 C38 1.510(3) . ?
C36 C37 1.383(3) . ?
 
loop_
    _geom_angle_atom_site_label_1
    _geom_angle_atom_site_label_2
    _geom_angle_atom_site_label_3
    _geom_angle
    _geom_angle_site_symmetry_1
    _geom_angle_site_symmetry_3
    _geom_angle_publ_flag
N2 Ca N1 80.24(5) . . ?
N2 Ca C30 118.16(6) . . ?
N1 Ca C30 130.00(6) . . ?
N2 Ca C30 119.88(6) . 3_666 ?
N1 Ca C30 123.54(5) . 3_666 ?
C30 Ca C30 88.91(6) . 3_666 ?
N2 Ca C31 104.82(5) . 3_666 ?
N1 Ca C31 103.70(5) . 3_666 ?
C30 Ca C31 113.77(6) . 3_666 ?
C30 Ca C31 24.86(5) 3_666 3_666 ?
C1 N1 C6 120.92(14) . . ?
C1 N1 Ca 128.73(11) . . ?
C6 N1 Ca 110.36(10) . . ?
C3 N2 C18 118.58(14) . . ?
C3 N2 Ca 128.28(11) . . ?
C18 N2 Ca 113.14(10) . . ?
N1 C1 C2 123.82(15) . . ?
N1 C1 C4 120.62(16) . . ?
C2 C1 C4 115.53(15) . . ?
C3 C2 C1 129.99(16) . . ?
N2 C3 C2 124.21(15) . . ?
N2 C3 C5 120.08(15) . . ?
C2 C3 C5 115.71(15) . . ?
C11 C6 C7 120.70(16) . . ?
C11 C6 N1 119.97(16) . . ?
C7 C6 N1 119.01(15) . . ?
C8 C7 C6 118.30(18) . . ?
C8 C7 C12 119.93(17) . . ?
C6 C7 C12 121.77(16) . . ?
C9 C8 C7 121.4(2) . . ?
C8 C9 C10 119.7(2) . . ?
C9 C10 C11 121.6(2) . . ?
C10 C11 C6 118.19(19) . . ?
C10 C11 C15 119.64(18) . . ?
C6 C11 C15 122.18(17) . . ?
C7 C12 C13 111.35(17) . . ?
C7 C12 C14 111.73(18) . . ?
C13 C12 C14 110.04(18) . . ?
C11 C15 C16 112.61(19) . . ?
C11 C15 C17 112.36(18) . . ?
C16 C15 C17 109.63(19) . . ?
C19 C18 C23 120.39(16) . . ?
C19 C18 N2 118.62(15) . . ?
C23 C18 N2 120.87(15) . . ?
C20 C19 C18 118.65(17) . . ?
C20 C19 C24 120.15(17) . . ?
C18 C19 C24 121.18(16) . . ?
C21 C20 C19 121.01(18) . . ?
C22 C21 C20 119.89(18) . . ?
C21 C22 C23 121.76(18) . . ?
C22 C23 C18 117.93(17) . . ?
C22 C23 C27 119.65(17) . . ?
C18 C23 C27 122.40(16) . . ?
C26 C24 C25 110.53(19) . . ?
C26 C24 C19 112.63(18) . . ?
C25 C24 C19 112.23(18) . . ?
C23 C27 C29 111.11(19) . . ?
C23 C27 C28 112.65(18) . . ?
C29 C27 C28 109.12(19) . . ?
C31 C30 Ca 174.37(15) . . ?
C31 C30 Ca 94.53(13) . 3_666 ?
Ca C30 Ca 91.09(6) . 3_666 ?
C30 C31 C32 178.06(19) . . ?
C30 C31 Ca 60.61(11) . 3_666 ?
C32 C31 Ca 121.28(12) . 3_666 ?
C37 C32 C33 118.36(17) . . ?
C37 C32 C31 121.14(16) . . ?
C33 C32 C31 120.50(17) . . ?
C34 C33 C32 120.16(19) . . ?
C33 C34 C35 121.59(19) . . ?
C34 C35 C36 117.88(18) . . ?
C34 C35 C38 120.6(2) . . ?
C36 C35 C38 121.5(2) . . ?
C37 C36 C35 121.2(2) . . ?
C36 C37 C32 120.76(18) . . ?
 
#===END
